# Supplementary material
Source: publisher site journal article supplement (https://www.spandidos-publications.com/7660/downloadSupplementary)
Supplement: Supplementary file [file downloadSupplementary]

## Data S1: Supplementary materials and methods

*Giemsa staining.* The cells were fixed with methanol (cat. no. 131-01826; Wako Pure Chemical Corporation) for 2 min at room temperature. Following fixation, the slides were immersed in Giemsa staining solution (cat. no. 1.09204.0500; Merck KGaA) for 25 min at room temperature. Giemsa staining solution was diluted 1:20 with 1/150 M phosphate buffer (cat. no. 73115; Kanto Chemical Corporation) (pH 6.4). The slides were then rinsed with tap water for 20-30 sec and air dried. After drying, the slides were sealed and the lagging chromosomes were observed under a light microscope (BX53F; Olympus Corporation).

*KNTC1 mRNA expression level and survival data of patients with gastric cancer.* Kaplan-Meier plots summarizing the association between the kinetochore-associated 1 (*KNTC1*) mRNA expression levels and survival in patients with gastric cancer. Data were obtained from The Human Protein Atlas (<https://www.proteinatlas.org/>) (1).

*Analysis of cell proliferation after KNTC1 knockdown.* The NCI-N87, KATOIII, MKN74 and TIG-1-20 cells were seeded in 96-well culture plates at a density of  $1.0 \times 10^4$  cells/well and transfected with siRNA targeting *KNTC1* or negative control (siControl) after 24 h. At 1, 2 and 3 days following transfection, 10  $\mu$ l reagent from a Cell Counting Kit-8

(cat. no. CK04; Dojindo Laboratories, Inc.) were added to each well, and the cells were cultured for 4 h at 37°C. Cell proliferation was measured by assessing the absorption at 450 nm using a Trister2 LB942 Multimode Reader (Berthold Technologies).

*Analysis of apoptotic bodies following KNTC1 knockdown.* The NCI-N87, KATOIII, MKN74 and TIG-1-20 cells were seeded into 4-well culture slides and cultured for 24 h at 37°C. After 24 h, the cells were transfected with siRNA targeting *KNTC1* or Negative Control (siControl). Following transfection, the cells are incubated for an additional 3 days and fixed for 20 min at room temperature with 4% paraformaldehyde. The slides were washed twice for 5 min each with phosphate-buffered saline and sealed using coverslips and VECTASHIELD Vibrance Antifade Mounting Medium with DAPI. Apoptotic bodies were observed fluorescence microscope (2).

## References

1. Uhlén M, Fagerberg L, Hallström BM, Lindskog C, Oksvold P, Mardinoglu A, Sivertsson Å, Kampf C, Sjöstedt E, Asplund A, *et al*: Tissue-based map of the human proteome. *Science* 347: 1260419, 2015.
2. Wu RS, Wu KC, Yang JS, Chiou SM, Yu CS, Chang SJ, Chueh FS and Chung JG: Etomidate induces cytotoxic effects and gene expression in a murine leukemia macrophage cell line (RAW264.7). *Anticancer Res* 31: 2203-2208, 2011.
